# Supplementary material
Source: publisher figshare collection journal article supplement (https://acs.figshare.com/ndownloader/files/13376033)
Supplement: Supplementary file 1 [file 13376033]

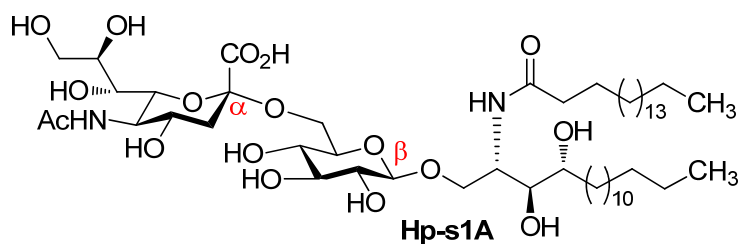

**Fig. S1. Hp-s1A (5-acetamido-3,5-dideoxy-D-glycero- $\alpha$ -D-galacto-2-nonulopyranosyloic acid)-(2 $\rightarrow$ 6)- $\beta$ -D-glucopyranosyl-(1 $\rightarrow$ 1)-(2*S*,3*S*,4*R*)- 2-octadecanoylaminoheptadecane-1,3,4-triol.** To a solution of protected **Hp-s1A** (9 mg, 0.0056 mmol) in MeOH/CH<sub>2</sub>Cl<sub>2</sub> (0.4 mL, 1:3 (v/v)) was added 10% Pd/C (1 mg) at room temperature. The reaction mixture was stirred under hydrogen balloon at room temperature for 16 h. The Pd/C was removed through a short pad of SiO<sub>2</sub>/Celite and the filter was washed with MeOH/CH<sub>2</sub>Cl<sub>2</sub> (1:5, v/v). The filtrate was concentrated in *vacuo*. The resulting white solid tetraol, without further purification, was dissolved in dry MeOH (0.3 mL) and then MeONa (1 mg, 88.61 mmol) was added to this solution at 0 °C. After stirring for 12 h at room temp, H<sub>2</sub>O was added to the reaction mixture. After completing the saponification, the solution was neutralized with Dowex 50w X 8 [H<sup>+</sup>]. The resin was filtered out and washed with MeOH/CHCl<sub>3</sub> (1:5, v/v). The filtrate was concentrated under reduced pressure to give a white solid residue. The residue was purified via flash column chromatography on silica gel (MeOH/CHCl<sub>3</sub>/H<sub>2</sub>O = 1:2.4:0.2 (v/v)) to yield 5 mg of **Hp-s1A** as a white solid compound in 78% yield:  $R_f$  = 0.40 (MeOH/CHCl<sub>3</sub>/H<sub>2</sub>O = 1:2.4:0.2, v/v);  $[\alpha]_D^{26}$  -6.7 (c 0.23, MeOH); FT-IR (neat)  $\nu_{\max}$  3345, 2919, 2850, 1628, 1550, 1467, 1378, 1130, 1072, 1036 cm<sup>-1</sup>; <sup>1</sup>H NMR (400 MHz, CD<sub>3</sub>OD)  $\delta$  4.24 (d,  $J$  = 7.7 Hz, 1H), 4.14-4.06 (m, 2H), 4.02 (dd,  $J$  = 10.7, 4.7 Hz, 1H), 3.88-3.83 (m, 2H), 3.83-3.47 (m, 2H), 3.45-3.40 (m, 1H), 3.37-3.34 (m, 2H), 2.85 (dd,  $J$  = 12.3, 4.0 Hz, 1H), 2.21 (t,  $J$  = 7.6 Hz, 2H), 2.01 (s, 3H), 1.64-1.54 (m, 6H), 1.28 (bs, 50H), 0.90 (t,  $J$  = 6.8 Hz, 6H); <sup>13</sup>C NMR (100 MHz, CD<sub>3</sub>OD)  $\delta$  176.4 (C), 175.9 (C), 105.0 (CH), 101.8 (C), 77.8 (CH), 76.7 (CH), 75.4 (CH), 75.0 (CH), 74.6 (CH), 73.3 (CH), 73.1 (CH), 71.6 (CH), 70.6 (CH<sub>2</sub>), 70.5 (CH), 69.7 (CH), 64.7 (CH<sub>2</sub>), 64.4 (CH<sub>2</sub>), 54.5 (CH), 52.3 (CH), 42.8 (CH<sub>2</sub>), 37.6 (CH<sub>2</sub>), 33.4 (CH<sub>2</sub>), 33.4 (CH), 32.2 (CH<sub>2</sub>), 31.2 (CH<sub>2</sub>), 31.2 (CH<sub>2</sub>), 31.1 (CH<sub>2</sub>), 31.1 (CH<sub>2</sub>), 31.1 (CH<sub>2</sub>), 31.0 (CH<sub>2</sub>), 31.0 (CH<sub>2</sub>), 31.0 (CH<sub>2</sub>), 30.8 (CH<sub>2</sub>), 30.8 (CH<sub>2</sub>), 30.7 (CH<sub>2</sub>), 27.5 (CH<sub>2</sub>), 24.0 (CH<sub>2</sub>), 22.9 (CH<sub>3</sub>), 14.8 (CH<sub>3</sub>); HRMS-ESI [M - H]<sup>-</sup> Calcd for C<sub>52</sub>H<sub>97</sub>N<sub>2</sub>O<sub>17</sub> 1021.6793, Found 1021.6798.
